# Supplementary material for: A comparative study of ionothermal treatment of rice straw using triflate and acetate-based ionic liquids
Source: Research Square preprint supplement (doi:10.21203/rs.3.rs-1005503/v1), 2021-10-22
Supplement: Supplementary file 1 [file a69b515710a7f24d3798b167.docx]

**Scheme 1:** Mechanism of cellulose interacting with IL (adapted and modified from (Bhaumik and Dhepe 2016), (Yang et al. 2000), and (De Melo et al. 2014) . The blue dots indicate H-bonding.
